# Supplementary material for: Pursuing carbon neutrality in China should enhance the resilience of its nitrogen-phosphorus coupled cycling network and also benefit food security
Source: Research Square preprint supplement (doi:10.21203/rs.3.rs-2358541/v1), 2023-01-17
Supplement: Supplementary file 1 [file 05fe2d712075dd02bcf884d7.pdf]

Additional Supplementary Table for Pursuing carbon neutrality in China should enhance the resilience of its nitrogen-phosphorus coupled cycling network and also benefit food security

Supplementary Table 1. The list of nodes in the China's nitrogen and phosphorus coupled cycling network

| ID  | Node names            | Types   | Categories            | Attributes       |
|-----|-----------------------|---------|-----------------------|------------------|
| N1  | Atmosphere            | sector  | Atmosphere            | N-P coupled node |
| N2  | Grassland             | sector  | Grassland             | N-P coupled node |
| N3  | Woodland              | sector  | Woodland              | N-P coupled node |
| N4  | Other non-arable land | sector  | Other non-arable land | N-P coupled node |
| N5  | Arable land           | sector  | Arable land           | N-P coupled node |
| N6  | Inland waters         | sector  | Inland waters         | N-P coupled node |
| N7  | Marine waters         | sector  | Marine waters         | N-P coupled node |
| N8  | Cultivation           | sector  | Cultivation           | N-P coupled node |
| N9  | Raw crops             | sector  | Cultivation           | N-P coupled node |
| N10 | Rice                  | product | Cultivation           | N-P coupled node |
| N11 | Wheat                 | product | Cultivation           | N-P coupled node |
| N12 | Maize                 | product | Cultivation           | N-P coupled node |
| N13 | Millet                | product | Cultivation           | N-P coupled node |
| N14 | Sorghum               | product | Cultivation           | N-P coupled node |
| N15 | Barley                | product | Cultivation           | N-P coupled node |
| N16 | Other grains          | product | Cultivation           | N-P coupled node |
| N17 | Beans                 | product | Cultivation           | N-P coupled node |
| N18 | Tubers                | product | Cultivation           | N-P coupled node |
| N19 | Peanut                | product | Cultivation           | N-P coupled node |
| N20 | Sesame                | product | Cultivation           | N-P coupled node |
| N21 | Sunflower             | product | Cultivation           | N-P coupled node |
| N22 | Other oil crops       | product | Cultivation           | N-P coupled node |
| N23 | Vegetable             | product | Cultivation           | N-P coupled node |
| N24 | melon and fruit       | product | Cultivation           | N-P coupled node |
| N25 | Sugarcane             | product | Cultivation           | N-P coupled node |
| N26 | Sugar beet            | product | Cultivation           | N-P coupled node |
| N27 | Cotton                | product | Cultivation           | N-P coupled node |
| N28 | Bast fibers           | product | Cultivation           | N-P coupled node |
| N29 | Tobacco               | product | Cultivation           | N-P coupled node |
| N30 | Seeds                 | sector  | Cultivation           | N-P coupled node |
| N31 | Crop straws           | sector  | Cultivation           | N-P coupled node |
| N32 | Rice crop straw       | product | Cultivation           | N-P coupled node |

|     |                             |         |                  |                  |
|-----|-----------------------------|---------|------------------|------------------|
| N33 | Wheat crop straw            | product | Cultivation      | N-P coupled node |
| N34 | Maize crop straw            | product | Cultivation      | N-P coupled node |
| N35 | Millet crop straw           | product | Cultivation      | N-P coupled node |
| N36 | Sorghum crop straw          | product | Cultivation      | N-P coupled node |
| N37 | Barley crop straw           | product | Cultivation      | N-P coupled node |
| N38 | Other grains crop straw     | product | Cultivation      | N-P coupled node |
| N39 | Beans crop straw            | product | Cultivation      | N-P coupled node |
| N40 | Tubers crop straw           | product | Cultivation      | N-P coupled node |
| N41 | Peanut crop straw           | product | Cultivation      | N-P coupled node |
| N42 | Sesame crop straw           | product | Cultivation      | N-P coupled node |
| N43 | Sunflower crop straw        | product | Cultivation      | N-P coupled node |
| N44 | Other oil crops straws      | product | Cultivation      | N-P coupled node |
| N45 | Vegetable crop straw        | product | Cultivation      | N-P coupled node |
| N46 | Melon and fruit crop straw  | product | Cultivation      | N-P coupled node |
| N47 | Sugarcane crop straw        | product | Cultivation      | N-P coupled node |
| N48 | Sugar beet crop straw       | product | Cultivation      | N-P coupled node |
| N49 | Cotton crop straw           | product | Cultivation      | N-P coupled node |
| N50 | Bast fibers crop straw      | product | Cultivation      | N-P coupled node |
| N51 | Tobacco crop straw          | product | Cultivation      | N-P coupled node |
| N52 | Pasture                     | sector  | Pasture          | N-P coupled node |
| N53 | Grazing cattle              | sector  | Pasture          | N-P coupled node |
| N54 | Live grazing cattle         | product | Pasture          | N-P coupled node |
| N55 | Excreta from grazing cattle | product | Pasture          | N-P coupled node |
| N56 | Grazing sheep               | sector  | Pasture          | N-P coupled node |
| N57 | Live grazing sheep          | product | Pasture          | N-P coupled node |
| N58 | Excreta from grazing sheep  | product | Pasture          | N-P coupled node |
| N59 | Animal husbandry            | sector  | Animal husbandry | N-P coupled node |
| N60 | Pig                         | sector  | Animal husbandry | N-P coupled node |
| N61 | Live pig                    | product | Animal husbandry | N-P coupled node |
| N62 | Excreta from pig            | product | Animal husbandry | N-P coupled node |
| N63 | Sheep                       | sector  | Animal husbandry | N-P coupled node |
| N64 | Live sheep                  | product | Animal husbandry | N-P coupled node |
| N65 | Excreta from sheep          | product | Animal husbandry | N-P coupled node |
| N66 | Cattle                      | sector  | Animal husbandry | N-P coupled node |
| N67 | Live cattle                 | product | Animal husbandry | N-P coupled node |
| N68 | Excreta from cattle         | product | Animal husbandry | N-P coupled node |

|      |                                                    |         |                                       |                  |
|------|----------------------------------------------------|---------|---------------------------------------|------------------|
| N69  | Milk                                               | product | Animal husbandry                      | N-P coupled node |
| N70  | Poultry                                            | sector  | Animal husbandry                      | N-P coupled node |
| N71  | Live poultry                                       | product | Animal husbandry                      | N-P coupled node |
| N72  | Excreta from poultry                               | product | Animal husbandry                      | N-P coupled node |
| N73  | Egg                                                | product | Animal husbandry                      | N-P coupled node |
| N74  | Horse                                              | sector  | Animal husbandry                      | N-P coupled node |
| N75  | Live horse                                         | product | Animal husbandry                      | N-P coupled node |
| N76  | Excreta from horse                                 | product | Animal husbandry                      | N-P coupled node |
| N77  | Donkey                                             | sector  | Animal husbandry                      | N-P coupled node |
| N78  | Live donkey                                        | product | Animal husbandry                      | N-P coupled node |
| N79  | Excreta from donkey                                | product | Animal husbandry                      | N-P coupled node |
| N80  | Freshwater aquaculture                             | sector  | Aquaculture                           | N-P coupled node |
| N81  | Fish aquaculture in fresh water                    | product | Aquaculture                           | N-P coupled node |
| N82  | Shrimp/crabs aquaculture in fresh water            | product | Aquaculture                           | N-P coupled node |
| N83  | Shellfish aquaculture in fresh water               | product | Aquaculture                           | N-P coupled node |
| N84  | Other aquaculture in fresh water                   | product | Aquaculture                           | N-P coupled node |
| N85  | Excessive feed input in fresh water                | product | Aquaculture                           | N-P coupled node |
| N86  | Seawater aquaculture                               | sector  | Aquaculture                           | N-P coupled node |
| N87  | Fish aquaculture in sea water                      | product | Aquaculture                           | N-P coupled node |
| N88  | Shrimp/crabs aquaculture in sea water              | product | Aquaculture                           | N-P coupled node |
| N89  | Shellfish aquaculture in sea water                 | product | Aquaculture                           | N-P coupled node |
| N90  | Algae aquaculture in sea water                     | product | Aquaculture                           | N-P coupled node |
| N91  | Other aquaculture in sea water                     | product | Aquaculture                           | N-P coupled node |
| N92  | Excessive feed input in sea water                  | product | Aquaculture                           | N-P coupled node |
| N93  | Chemical pesticide                                 | product | Pesticide and detergent<br>production | N-P coupled node |
| N94  | Waste water from chemical pesticide<br>production  | product | Pesticide and detergent<br>production | N-P coupled node |
| N95  | Soap and detergent                                 | product | Pesticide and detergent<br>production | N-P coupled node |
| N96  | Waste water from synthetic detergent<br>production | product | Pesticide and detergent<br>production | N-P coupled node |
| N97  | Refined grain production                           | sector  | Agricultural products<br>processing   | N-P coupled node |
| N98  | Milled rice                                        | product | Agricultural products<br>processing   | N-P coupled node |
| N99  | Flour                                              | product | Agricultural products<br>processing   | N-P coupled node |
| N100 | Rice bran                                          | product | Agricultural products<br>processing   | N-P coupled node |
| N101 | Wheat middling and bran                            | product | Agricultural products<br>processing   | N-P coupled node |
| N102 | Rice husk                                          | product | Agricultural products<br>processing   | N-P coupled node |
| N103 | Waste of refined grain production                  | product | Agricultural products<br>processing   | N-P coupled node |
| N104 | Coarse grain production                            | sector  | Agricultural products<br>processing   | N-P coupled node |

|      |                                                   |         |                                  |                  |
|------|---------------------------------------------------|---------|----------------------------------|------------------|
| N105 | Maize                                             | product | Agricultural products processing | N-P coupled node |
| N106 | Cereals                                           | product | Agricultural products processing | N-P coupled node |
| N107 | Cereal husk                                       | product | Agricultural products processing | N-P coupled node |
| N108 | Cereal bran                                       | product | Agricultural products processing | N-P coupled node |
| N109 | Soybean                                           | product | Agricultural products processing | N-P coupled node |
| N110 | Tubers                                            | product | Agricultural products processing | N-P coupled node |
| N111 | Waste of coarse grain production                  | product | Agricultural products processing | N-P coupled node |
| N112 | Oil production                                    | sector  | Agricultural products processing | N-P coupled node |
| N113 | Oil                                               | product | Agricultural products processing | N-P coupled node |
| N114 | Bean cake                                         | product | Agricultural products processing | N-P coupled node |
| N115 | Soybean meal                                      | product | Agricultural products processing | N-P coupled node |
| N116 | Oil cake                                          | product | Agricultural products processing | N-P coupled node |
| N117 | Meat production                                   | sector  | Agricultural products processing | N-P coupled node |
| N118 | Pork                                              | product | Agricultural products processing | N-P coupled node |
| N119 | Mutton                                            | product | Agricultural products processing | N-P coupled node |
| N120 | Beef                                              | product | Agricultural products processing | N-P coupled node |
| N121 | Poultry meat                                      | product | Agricultural products processing | N-P coupled node |
| N122 | Horse meat                                        | product | Agricultural products processing | N-P coupled node |
| N123 | Donkey meat                                       | product | Agricultural products processing | N-P coupled node |
| N124 | Slaughter waste water                             | product | Agricultural products processing | N-P coupled node |
| N125 | Animal leather                                    | product | Agricultural products processing | N-P coupled node |
| N126 | Animal bones                                      | product | Agricultural products processing | N-P coupled node |
| N127 | Vegetables, melons and fruits production          | sector  | Agricultural products processing | N-P coupled node |
| N128 | Vegetables                                        | product | Agricultural products processing | N-P coupled node |
| N129 | Melons and fruits                                 | product | Agricultural products processing | N-P coupled node |
| N130 | Waste of vegetables, melons and fruits production | product | Agricultural products processing | N-P coupled node |
| N131 | Egg and dairy products production                 | sector  | Agricultural products processing | N-P coupled node |
| N132 | Dairy products                                    | product | Agricultural products processing | N-P coupled node |
| N133 | Egg                                               | product | Agricultural products processing | N-P coupled node |
| N134 | Waste of egg and dairy products production        | product | Agricultural products processing | N-P coupled node |
| N135 | Aquatic product production                        | sector  | Agricultural products processing | N-P coupled node |
| N136 | Aquatic products                                  | product | Agricultural products processing | N-P coupled node |
| N137 | Fish Meal                                         | product | Agricultural products processing | N-P coupled node |
| N138 | Waste of aquatic product production               | product | Agricultural products processing | N-P coupled node |
| N139 | Sugar production                                  | sector  | Agricultural products processing | N-P coupled node |
| N140 | Sugar                                             | product | Agricultural products processing | N-P coupled node |

|      |                                                         |         |                                  |                  |
|------|---------------------------------------------------------|---------|----------------------------------|------------------|
| N141 | Sugar production waste water                            | product | Agricultural products processing | N-P coupled node |
| N142 | Sugar production waste utilization                      | product | Agricultural products processing | N-P coupled node |
| N143 | Waste reprocessing                                      | sector  | Agricultural products processing | N-P coupled node |
| N144 | Reusable waste                                          | product | Agricultural products processing | N-P coupled node |
| N145 | Non-reusable waste                                      | product | Agricultural products processing | N-P coupled node |
| N146 | Feed production                                         | sector  | Agricultural products processing | N-P coupled node |
| N147 | Livestock feed                                          | product | Agricultural products processing | N-P coupled node |
| N148 | Aquatic feed                                            | product | Agricultural products processing | N-P coupled node |
| N149 | Non-food products production                            | sector  | Agricultural products processing | N-P coupled node |
| N150 | Feed ingredients after processing                       | product | Agricultural products processing | N-P coupled node |
| N151 | Waste water from non-food products production           | product | Agricultural products processing | N-P coupled node |
| N152 | Non-food products                                       | product | Agricultural products processing | N-P coupled node |
| N153 | Urban consumption                                       | sector  | Human consumption                | N-P coupled node |
| N154 | Excreta from urban household consumption                | product | Human consumption                | N-P coupled node |
| N155 | Waste water from urban household consumption            | product | Human consumption                | N-P coupled node |
| N156 | Kitchen waste from urban household consumption          | product | Human consumption                | N-P coupled node |
| N157 | Other waste from urban household consumption            | product | Human consumption                | N-P coupled node |
| N158 | Rural consumption                                       | sector  | Human consumption                | N-P coupled node |
| N159 | Residues of burning straw for energy use in rural areas | product | Human consumption                | N-P coupled node |
| N160 | Excreta from rural household consumption                | product | Human consumption                | N-P coupled node |
| N161 | Waste water from rural household consumption            | product | Human consumption                | N-P coupled node |
| N162 | Kitchen waste from rural household consumption          | product | Human consumption                | N-P coupled node |
| N163 | Other waste from rural household consumption            | product | Human consumption                | N-P coupled node |
| N164 | Industrial waste water treatment                        | sector  | Waste water treatment            | N-P coupled node |
| N165 | Effluents from industrial waste water treatment         | sector  | Waste water treatment            | N-P coupled node |
| N166 | Treated waste water from pesticide production           | product | Waste water treatment            | N-P coupled node |
| N167 | Treated waste water from soap and detergent production  | product | Waste water treatment            | N-P coupled node |
| N168 | Treated waste water from slaughtering                   | product | Waste water treatment            | N-P coupled node |
| N169 | Treated waste water from sugar production               | product | Waste water treatment            | N-P coupled node |
| N170 | Treated waste water from other production               | product | Waste water treatment            | N-P coupled node |
| N171 | Domestic waste water treatment                          | sector  | Waste water treatment            | N-P coupled node |
| N172 | Effluents from domestic waste water treatment           | product | Waste water treatment            | N-P coupled node |
| N173 | Industrial solid waste disposal                         | sector  | Solid waste disposal             | N-P coupled node |
| N174 | Accumulation of industrial solid waste                  | sector  | Solid waste disposal             | N-P coupled node |
| N175 | Landfill of industrial solid waste                      | sector  | Solid waste disposal             | N-P coupled node |
| N176 | Incineration of industrial solid waste                  | sector  | Solid waste disposal             | N-P coupled node |

|      |                                                   |         |                                                  |                  |
|------|---------------------------------------------------|---------|--------------------------------------------------|------------------|
| N177 | Compost of industrial solid waste                 | sector  | Solid waste disposal                             | N-P coupled node |
| N178 | Domestic solid waste disposal                     | sector  | Solid waste disposal                             | N-P coupled node |
| N179 | Accumulation of domestic solid waste              | sector  | Solid waste disposal                             | N-P coupled node |
| N180 | Landfill of domestic solid waste                  | sector  | Solid waste disposal                             | N-P coupled node |
| N181 | Incineration of domestic solid waste              | sector  | Solid waste disposal                             | N-P coupled node |
| N182 | Compost of domestic solid waste                   | sector  | Solid waste disposal                             | N-P coupled node |
| N183 | International trade                               | sector  | International trade                              | N-P coupled node |
| N184 | Stock*                                            | sector  | Stock                                            | N-P coupled node |
| N185 | Balancing node                                    | sector  | Balancing node                                   | N-P coupled node |
| N186 | P mining and processing                           | sector  | P mining and processing                          | P-special node   |
| N187 | Lager and medium P rocks from mining              | product | P mining and processing                          | P-special node   |
| N188 | Small P rocks from mining                         | product | P mining and processing                          | P-special node   |
| N189 | Raw phosphate rock                                | product | P mining and processing                          | P-special node   |
| N190 | P concentrates from beneficiation                 | product | P mining and processing                          | P-special node   |
| N191 | Tailings from beneficiation                       | product | P mining and processing                          | P-special node   |
| N192 | Waste water from beneficiation                    | product | P mining and processing                          | P-special node   |
| N193 | P fertilizer production                           | sector  | P chemical production                            | P-special node   |
| N194 | P fertilizer                                      | product | P chemical production                            | P-special node   |
| N195 | Waste water from P fertilizer production          | product | P chemical production                            | P-special node   |
| N196 | Phosphogypsum                                     | product | P chemical production                            | P-special node   |
| N197 | Feed additive production                          | sector  | P chemical production                            | P-special node   |
| N198 | Feed additives                                    | product | P chemical production                            | P-special node   |
| N199 | Waste water from feed additive production         | product | P chemical production                            | P-special node   |
| N200 | Solid wastes from feed additive production        | product | P chemical production                            | P-special node   |
| N201 | Elemental P production                            | sector  | P chemical production                            | P-special node   |
| N202 | Elemental P                                       | product | P chemical production                            | P-special node   |
| N203 | Waste water from elemental P production           | product | P chemical production                            | P-special node   |
| N204 | Phosphorus slag from elemental P production       | product | P chemical production                            | P-special node   |
| N205 | Ferrophosphorus from elemental P production       | product | P chemical production                            | P-special node   |
| N206 | Phosphorus slime from elemental P production      | product | P chemical production                            | P-special node   |
| N207 | Pesticide production                              | sector  | P chemical production                            | P-special node   |
| N208 | Detergent production                              | sector  | P chemical production                            | P-special node   |
| N209 | Other P chemical production                       | sector  | P chemical production                            | P-special node   |
| N210 | Waste water of oil extraction                     | product | P-related waste water from household consumption | P-special node   |
| N211 | Solid waste from non-food products production     | product | P-related waste water from household consumption | P-special node   |
| N212 | Treated waste water from beneficiation production | product | P-related waste water treatment                  | P-special node   |

|      |                                                                    |         |                                 |                |
|------|--------------------------------------------------------------------|---------|---------------------------------|----------------|
| N213 | Treated waste water from P fertilizer production                   | product | P-related waste water treatment | P-special node |
| N214 | Treated waste water from feed additive production                  | product | P-related waste water treatment | P-special node |
| N215 | Treated waste water from elemental P production                    | product | P-related waste water treatment | P-special node |
| N216 | Treated waste water from oil production                            | product | P-related waste water treatment | P-special node |
| N217 | Sludge from industrial waste water treatment                       | sector  | P-related waste water treatment | P-special node |
| N218 | Sludge from waste water treatment in beneficiation production      | product | P-related waste water treatment | P-special node |
| N219 | Sludge from waste water treatment in P fertilizer production       | product | P-related waste water treatment | P-special node |
| N220 | Sludge from waste water treatment in feed additive production      | product | P-related waste water treatment | P-special node |
| N221 | Sludge from waste water treatment in elemental P production        | product | P-related waste water treatment | P-special node |
| N222 | Sludge from waste water treatment in pesticide production          | product | P-related waste water treatment | P-special node |
| N223 | Sludge from waste water treatment in soap and detergent production | product | P-related waste water treatment | P-special node |
| N224 | Sludge from waste water treatment in oil production                | product | P-related waste water treatment | P-special node |
| N225 | Sludge from waste water treatment in slaughtering                  | product | P-related waste water treatment | P-special node |
| N226 | Sludge from waste water treatment in sugar production              | product | P-related waste water treatment | P-special node |
| N227 | Sludge from waste water treatment in other production              | product | P-related waste water treatment | P-special node |
| N228 | Sludge from the treatment of domestic waste water                  | product | P-related waste water treatment | P-special node |
| N229 | Agricultural energy consumption                                    | product | Agricultural energy consumption | N-special node |
| N230 | Synthetic ammonia production                                       | sector  | N chemical production           | N-special node |
| N231 | Synthetic ammonia                                                  | product | N chemical production           | N-special node |
| N232 | Waste water from synthetic ammonia production                      | product | N chemical production           | N-special node |
| N233 | Waste gas from synthetic ammonia production                        | product | N chemical production           | N-special node |
| N234 | N fertilizer production                                            | sector  | N chemical production           | N-special node |
| N235 | N fertilizer                                                       | product | N chemical production           | N-special node |
| N236 | Waste water from nitrogen fertilizer production                    | product | N chemical production           | N-special node |
| N237 | Waste gas from nitrogen fertilizer production                      | product | N chemical production           | N-special node |
| N238 | Nitrogen-containing industrial products production                 | sector  | N chemical production           | N-special node |
| N239 | Chemical medicament                                                | product | N chemical production           | N-special node |
| N240 | Industrial explosives                                              | product | N chemical production           | N-special node |
| N241 | Caprolactam                                                        | product | N chemical production           | N-special node |
| N242 | Primary form of plastic                                            | product | N chemical production           | N-special node |
| N243 | Natural rubber                                                     | product | N chemical production           | N-special node |
| N244 | Synthetic rubber                                                   | product | N chemical production           | N-special node |
| N245 | Synthetic fiber                                                    | product | N chemical production           | N-special node |
| N246 | Waste water from chemical medicament production                    | product | N chemical production           | N-special node |
| N247 | Waste water from natural rubber and synthetic rubber production    | product | N chemical production           | N-special node |
| N248 | Waste water from synthetic fiber production                        | product | N chemical production           | N-special node |

|      |                                                                         |         |                                               |                |
|------|-------------------------------------------------------------------------|---------|-----------------------------------------------|----------------|
| N249 | Waste water from other production                                       | product | N chemical production                         | N-special node |
| N250 | Solid waste from industrial production                                  | product | N chemical production                         | N-special node |
| N251 | Waste gas from industrial production                                    | product | N chemical production                         | N-special node |
| N252 | Waste gas from non-food products production                             | product | N chemical production                         | N-special node |
| N253 | Urban human metabolism                                                  | product | N-related emission from household consumption | N-special node |
| N254 | Energy consumption waste gas from urban household consumption           | product | N-related emission from household consumption | N-special node |
| N255 | Rural human metabolism                                                  | product | N-related emission from household consumption | N-special node |
| N256 | Energy consumption waste gas from rural household consumption           | product | N-related emission from household consumption | N-special node |
| N257 | Treated waste water from synthetic ammonia production                   | product | N-related waste water treatment               | N-special node |
| N258 | Treated waste water from nitrogen fertilizer production                 | product | N-related waste water treatment               | N-special node |
| N259 | Treated waste water from chemical medicament production                 | product | N-related waste water treatment               | N-special node |
| N260 | Treated waste water from natural rubber and synthetic rubber production | product | N-related waste water treatment               | N-special node |
| N261 | Treated waste water from synthetic fiber production                     | product | N-related waste water treatment               | N-special node |
| N262 | Gas emissions after industrial waste water treatment                    | product | N-related waste water treatment               | N-special node |
| N263 | Gas emissions after domestic waste water treatment                      | product | N-related waste water treatment               | N-special node |
| N264 | Gas emission after industrial solid waste accumulation treatment        | product | N-related solid waste disposal                | N-special node |
| N265 | Solid discharge after industrial solid waste accumulation treatment     | product | N-related solid waste disposal                | N-special node |
| N266 | Liquid discharge after industrial solid waste accumulation treatment    | product | N-related solid waste disposal                | N-special node |
| N267 | Gas emission after industrial solid waste landfill treatment            | product | N-related solid waste disposal                | N-special node |
| N268 | Solid discharge after industrial solid waste landfill treatment         | product | N-related solid waste disposal                | N-special node |
| N269 | Liquid discharge after industrial solid waste landfill treatment        | product | N-related solid waste disposal                | N-special node |
| N270 | Gas emission after industrial solid waste incineration treatment        | product | N-related solid waste disposal                | N-special node |
| N271 | Gas emission after industrial solid waste compost treatment             | product | N-related solid waste disposal                | N-special node |
| N272 | Solid discharge after industrial solid waste compost treatment          | product | N-related solid waste disposal                | N-special node |
| N273 | Liquid discharge after industrial solid waste compost treatment         | product | N-related solid waste disposal                | N-special node |
| N274 | Gas emission after domestic solid waste accumulation treatment          | product | N-related solid waste disposal                | N-special node |
| N275 | Solid discharge after domestic solid waste accumulation treatment       | product | N-related solid waste disposal                | N-special node |
| N276 | Liquid discharge after domestic solid waste accumulation treatment      | product | N-related solid waste disposal                | N-special node |
| N277 | Gas emission after domestic solid waste landfill treatment              | product | N-related solid waste disposal                | N-special node |
| N278 | Solid discharge after domestic solid waste landfill treatment           | product | N-related solid waste disposal                | N-special node |
| N279 | Liquid discharge after domestic solid waste landfill treatment          | product | N-related solid waste disposal                | N-special node |
| N280 | Gas emission after domestic solid waste incineration treatment          | product | N-related solid waste disposal                | N-special node |
| N281 | Gas emission after domestic solid waste compost treatment               | product | N-related solid waste disposal                | N-special node |
| N282 | Solid discharge after domestic solid waste compost treatment            | product | N-related solid waste disposal                | N-special node |
| N283 | Liquid discharge after domestic solid waste compost treatment           | product | N-related solid waste disposal                | N-special node |

Note: Stock is a terminology from material flow analysis, which refers to both in-use stock (e.g., animals, human beings, etc.) and product inventories (e.g., P rock inventory).
